# Supplementary material for: Candida antarctica lipase B-catalyzed synthesis of polyesters: starting from ketones via a tandem BVO/ROP process
Source: Royal Society of Chemistry journal article supplement (doi:10.1039/c3ra47493c), 2014-01-01
Supplement: c3ra47493c.pdf [file c3ra47493c.pdf]

## Supporting Information

### ***Candida antarctica* Lipase B-catalyzed synthesis of polyesters: starting from ketone via tandem BVO/ROP process**

Jiaren Zhong, Fan Xu, Jianfeng Wang, Yanyan Li, Xianfu Lin, Qi Wu\*

Department of Chemistry, Zhejiang University, Hangzhou 310027, Zhejiang, PR China. Fax: +86 571 87952618; Tel.: +86 571 87951588; E-mail: llc123@zju.edu.cn (Q. Wu)

Corresponding author: llc123@zju.edu.cn (Q. Wu)

#### **Content:**

- 1. Optimization of the conditions for Baeyer–Villiger oxidation**
  - Fig. S1** Reaction time curves of the Baeyer–Villiger oxidation of 4-methylcyclohexanone (1a) at 50°C monitored by GC.
  - Fig. S2** Effect of temperature on the oxidation of 4-methylcyclohexanone (24h)
  - Fig. S3** GC chromatogram of the oxidation of 3-methylcyclohexanone at 50°C after 24h showing 3-MeCL and 5-MeCL in the crude reaction mixture.
  - Table S1** Different solvents used for the oxidation of 4-methylcyclohexanone
  - Table S2** Effect of molar ratio of H<sub>2</sub>O<sub>2</sub>/ substrate on the oxidation of 4-methylcyclohexanone.
  - Table S3** Detailed data about the influence of reaction time and temperature on the oxidation of substituted cyclohexanones.
- 2. Data of substituted lactones**
- 3. NMR spectra of 3-MeCL and 5-MeCL, and the corresponding polyester**
- 4. Representative Gas Chromatographic (GC) data**
- 5. Representative gel permeation chromatography (GPC) data**
  - 5.1** GPC chromatograms of reactions listed in Table 2
  - 5.2** GPC chromatograms of reactions listed in Table 3
  - 5.3** GPC chromatograms of reactions shown in Fig. 2
  - 5.4** GPC chromatograms of reactions shown in Fig. 3
  - 5.5** GPC chromatograms of reactions shown in Fig. 4

## 1 Optimization of the conditions for Baeyer–Villiger oxidation

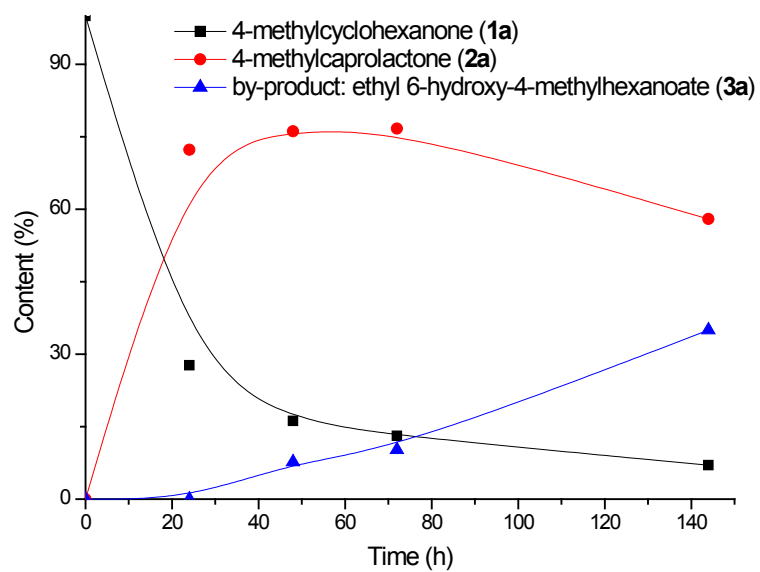

**Fig. S1** Reaction time curves of the Baeyer–Villiger oxidation of 4-methylcyclohexanone (**1a**) at 50°C monitored by GC.

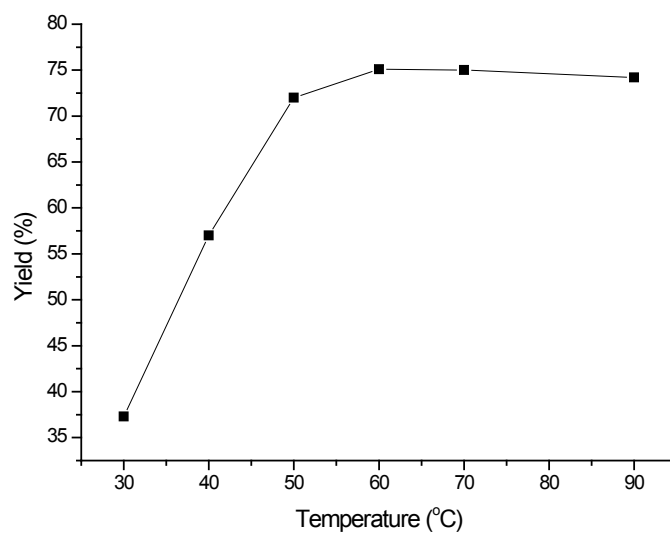

**Fig. S2** Effect of temperature on the oxidation of 4-methylcyclohexanone (24h)

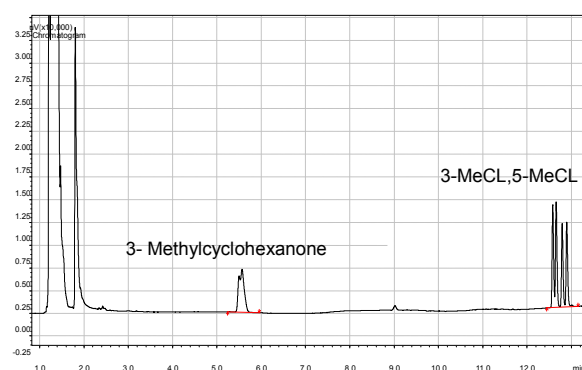

**Fig. S3** GC chromatogram of the oxidation of 3-methylcyclohexanone at 50°C after 24h showing 3-MeCL and 5-MeCL in the crude reaction mixture.

**Table S1** Different solvents used for the oxidation of 4-methylcyclohexanone<sup>a</sup>.

| Solvent                         | EA/ substrate | Yield% <sup>b</sup> |
|---------------------------------|---------------|---------------------|
| Toluene                         | 2:1           | -                   |
| Tert-amyl alcohol               | 2:1           | -                   |
| Methyl Tertiary Butyl Ether     | 2:1           | -                   |
| CH <sub>2</sub> Cl <sub>2</sub> | 2:1           | -                   |
| Ethyl acetate                   | -             | 72.3                |

<sup>a</sup> Reactions were carried out at 50 °C for 24h. <sup>b</sup> Determined by GC.

**Table S2** Effect of molar ratio of H<sub>2</sub>O<sub>2</sub>/ substrate on the oxidation of 4-methylcyclohexanone.

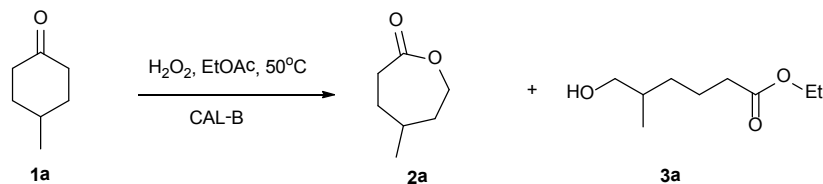

| H <sub>2</sub> O <sub>2</sub> / substrate | Time/H | Substrate% | Product% | By-product% |
|-------------------------------------------|--------|------------|----------|-------------|
| 1/1                                       | 24     | 42.6       | 50.2     | 7.2         |
|                                           | 48     | 27.9       | 53.9     | 18.2        |
|                                           | 72     | 29.7       | 51.3     | 18.9        |
| 1.5/1                                     | 24     | 26.0       | 70.8     | 3.2         |
|                                           | 48     | 12.5       | 76.2     | 11.3        |
|                                           | 72     | 9.3        | 71.5     | 19.2        |
| 2/1                                       | 24     | 22.2       | 75.1     | 2.7         |
|                                           | 48     | 9.1        | 77.7     | 13.2        |
|                                           | 72     | 4.4        | 71.5     | 24.1        |
| 3/1                                       | 24     | 24.3       | 74.0     | 1.7         |
|                                           | 48     | 15.7       | 80.3     | 4.0         |
|                                           | 72     | 11.1       | 80.1     | 8.8         |

**Table S3** Detailed data about the influence of reaction time and temperature on the oxidation of substituted cyclohexanones.

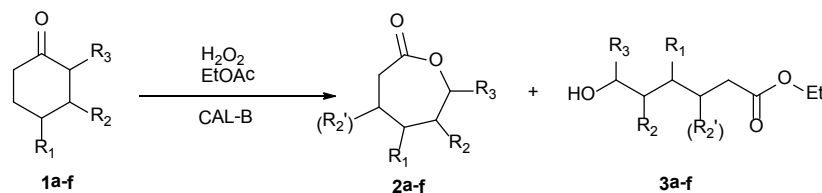

| Substrate                         | Entry       | T/°C      | Time/h    | Substrate%  | Product%    | By-product% |
|-----------------------------------|-------------|-----------|-----------|-------------|-------------|-------------|
| 4-Methylcyclohexanone<br>(1a)     | S1-1        | 30        | 24        | 62.7        | 37.3        | -           |
|                                   | S1-2        | 30        | 48        | 39.3        | 58.7        | 2.0         |
|                                   | S1-3        | 30        | 72        | 35.3        | 60.5        | 4.2         |
|                                   | <b>S1-4</b> | <b>50</b> | <b>24</b> | <b>27.7</b> | <b>72.3</b> | -           |
|                                   | S1-5        | 50        | 48        | 16.2        | 76.1        | 7.7         |
|                                   | S1-6        | 50        | 72        | 13.1        | 76.7        | 10.2        |
|                                   | S1-7        | 70        | 24        | 19.7        | 75.0        | 5.3         |
|                                   | S1-8        | 70        | 48        | 17.0        | 69.4        | 13.6        |
|                                   | S1-9        | 70        | 72        | 17.0        | 56.9        | 26.1        |
|                                   | S1-10       | 90        | 24        | 23.6        | 74.3        | 2.1         |
|                                   | S1-11       | 90        | 48        | 15.0        | 76.3        | 8.7         |
|                                   | S1-12       | 90        | 72        | 13.8        | 74.0        | 12.2        |
| 4-Ethylcyclohexanone<br>(1b)      | S2-1        | 30        | 24        | 65.5        | 34.5        | -           |
|                                   | S2-2        | 30        | 48        | 44.6        | 55.4        | -           |
|                                   | S2-3        | 30        | 72        | 28.0        | 72.0        | -           |
|                                   | <b>S2-4</b> | <b>50</b> | <b>24</b> | <b>23.2</b> | <b>76.8</b> | -           |
|                                   | S2-5        | 50        | 48        | 14.2        | 76.5        | 9.3         |
|                                   | S2-6        | 50        | 72        | 13.5        | 72.0        | 14.5        |
|                                   | S2-7        | 70        | 24        | 26.4        | 70.1        | 3.5         |
|                                   | S2-8        | 70        | 48        | 20.5        | 68.2        | 11.2        |
|                                   | S2-9        | 70        | 72        | 21.8        | 59.2        | 19.0        |
| 4-phenylcyclohexanone<br>(1c)     | S3-1        | 30        | 24        | 99          | -           | -           |
|                                   | S3-2        | 30        | 72        | 100         | -           | -           |
|                                   | <b>S3-3</b> | <b>50</b> | <b>24</b> | <b>57.6</b> | <b>42.4</b> | -           |
|                                   | S3-4        | 50        | 72        | 34.4        | 28.3        | 37.3        |
|                                   | S3-5        | 70        | 48        | 53.1        | 46.9        | -           |
|                                   | S3-6        | 70        | 72        | 20.1        | 39.3        | 40.5        |
| 4-tert-Butylcyclohexanone<br>(1d) | S4-1        | 30        | 24        | 62.4        | 37.6        | -           |
|                                   | S4-2        | 30        | 48        | 38.3        | 61.7        | -           |
|                                   | S4-3        | 30        | 72        | 27.3        | 53.3        | 19.4        |
|                                   | S4-4        | 50        | 24        | 27.1        | 72.3        | 0.6         |
|                                   | S4-5        | 50        | 48        | 21.2        | 77.8        | 1.0         |
|                                   | S4-6        | 50        | 72        | 18.4        | 77.7        | 3.9         |
|                                   | <b>S4-7</b> | <b>70</b> | <b>24</b> | <b>16.0</b> | <b>82.6</b> | <b>1.4</b>  |
|                                   | S4-8        | 70        | 48        | 8.7         | 86.5        | 4.8         |

|                                        |             |           |           |             |             |            |
|----------------------------------------|-------------|-----------|-----------|-------------|-------------|------------|
|                                        | S4-9        | 70        | 72        | 5.2         | 84.8        | 10.0       |
| 2-Methylcyclohexanone<br>( <b>1e</b> ) | S5-1        | 30        | 24        | 29.0        | 67.6        | 3.5        |
|                                        | S5-2        | 30        | 48        | 8.3         | 83.2        | 8.5        |
|                                        | S5-3        | 30        | 72        | 3.0         | 82.2        | 14.8       |
|                                        | <b>S5-4</b> | <b>50</b> | <b>24</b> | <b>10.0</b> | <b>80.7</b> | <b>9.3</b> |
|                                        | S5-5        | 50        | 48        | 3.1         | 73.7        | 23.2       |
|                                        | S5-6        | 50        | 72        | 3.3         | 73.4        | 23.3       |
|                                        | S5-7        | 70        | 24        | 16.2        | 76.2        | 7.6        |
|                                        | S5-8        | 70        | 48        | 7.9         | 69.2        | 22.9       |
|                                        | S5-9        | 70        | 72        | 1.7         | 52.7        | 45.6       |
| 3-Methylcyclohexanone<br>( <b>1f</b> ) | S6-1        | 30        | 24        | 77.5        | 22.5        | -          |
|                                        | S6-2        | 30        | 48        | 55.0        | 45.0        | -          |
|                                        | S6-3        | 30        | 72        | 48.5        | 48.9        | 2.6        |
|                                        | S6-4        | 50        | 24        | 37.7        | 62.3        | -          |
|                                        | S6-5        | 50        | 48        | 30.4        | 65.1        | 4.5        |
|                                        | S6-6        | 50        | 72        | 24.3        | 69.3        | 6.4        |
|                                        | <b>S6-7</b> | <b>70</b> | <b>24</b> | <b>28.8</b> | <b>71.2</b> | -          |
|                                        | S6-8        | 70        | 48        | 17.5        | 70.0        | 12.5       |
|                                        | S6-9        | 70        | 72        | 14.4        | 65.8        | 19.8       |

## 2 Data of substituted lactones

<sup>1</sup>H-NMR (400 MHz, CDCl<sub>3</sub>, δ, ppm) for 4-methylcaprolactone (4-MeCL, **2a**): 4.240-4.087 (m, 2 H), 2.628-2.518 (m, 2 H), 1.888-1.792 (m, 2 H), 1.702 (m, 1 H), 1.478-1.387 (dd, 1 H), 1.311-1.220 (dd, 1 H), 0.941 (d, 3 H). IR (cm<sup>-1</sup>): 2955, 2927, 2872, 1732, 1449, 1391, 1338, 1282, 1179, 1164, 1079, 1007, 935.

<sup>1</sup>H-NMR (400 MHz, CDCl<sub>3</sub>, δ, ppm) for 4-ethylcaprolactone (4-EtCL, **2b**): 4.293-4.073 (m, 2 H), 2.675-2.534 (m, 2 H), 1.931 (m, 2 H), 1.448 (m, 2 H), 1.313-1.222 (m, 3 H), 0.880 (t, 3 H). IR (cm<sup>-1</sup>): 2961, 2928, 2875, 1733, 1460, 1381, 1350, 1248, 1169, 1100, 1059, 997.

<sup>1</sup>H-NMR (400 MHz, CDCl<sub>3</sub>, δ, ppm) for 4-phenylcaprolactone (4-PhCL, **2c**): 7.340-7.186 (m, 5 H), 4.358 (m, 2 H), 2.788 (m, 3 H), 2.068 (m, 3 H), 1.868 (m, 1 H). IR (cm<sup>-1</sup>): 2960, 2871, 1732, 1602, 1474, 1394, 1366, 1337, 1250, 1161, 1088, 1039, 995, 762, 702.

<sup>1</sup>H-NMR (400 MHz, CDCl<sub>3</sub>, δ, ppm) for 4-tert-butylcaprolactone (4-tBuCL, **2d**): 4.277 (dd, 1 H), 4.086 (t, 1 H), 2.628 (dd, 1 H), 2.508 (t, 1 H), 1.978 (m, 2 H), 1.464 (dd, 1 H), 1.273 (t, 2 H), 0.824 (s, 9H). IR (cm<sup>-1</sup>): 2963, 2870, 1736, 1477, 1437, 1396, 1367, 1339, 1294, 1253, 1194, 1177, 1078, 1021.

<sup>1</sup>H-NMR (400 MHz, CDCl<sub>3</sub>, δ, ppm) for 6-methylcaprolactone (6-MeCL, **2e**): 4.421 (m, 1 H), 2.604 (m, 2 H), 1.879 (m, 3 H), 1.568 (m, 3 H), 1.304 (d, 3 H). IR (cm<sup>-1</sup>): 2967, 2936, 2865, 1730, 1711, 1458, 1408, 1377, 1238, 1176, 1129, 1091.

<sup>1</sup>H-NMR (400 MHz, CDCl<sub>3</sub>, δ, ppm) for 3-methylcaprolactone (3-MeCL, **2f-a**) and 5-methylcaprolactone (5-MeCL, **2f-b**): 4.237-4.125 (m, 2 H), 4.086-3.926 (m, 2 H), 2.606-2.515 (m, 4 H), 1.914-1.765 (m, 6 H), 1.655 (m, 1 H), 1.577 (m, 1 H), 1.366 (m, 2 H), 1.021 (d, 2 H), 0.915 (d, 2 H). IR (cm<sup>-1</sup>): 2957, 2928, 2869, 1732, 1460, 1381, 1352, 1283, 1248, 1209, 1171, 1099, 995.

### 3. NMR spectra of 3-MeCL and 5-MeCL, and the corresponding polyester

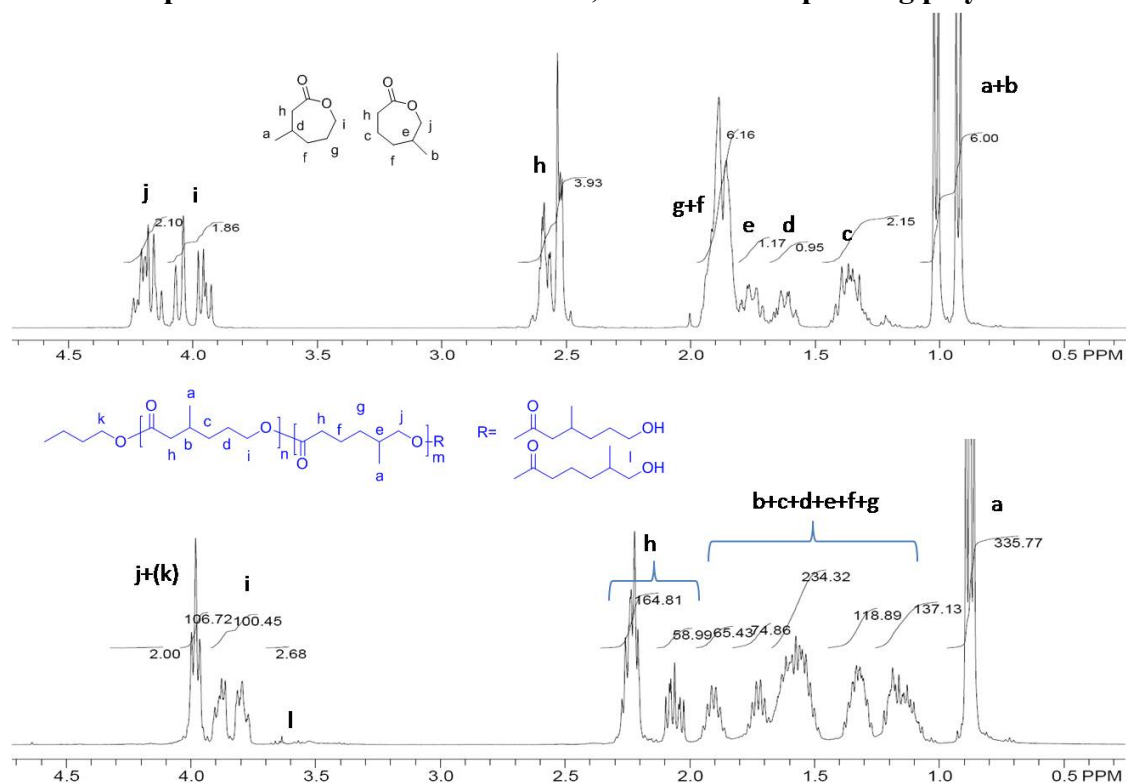

**Fig. S4** <sup>1</sup>H-NMR of the mixture of 3-MeCL and 5-MeCL, and the corresponding polyester prepared via one-pot process.

### 4. Representative Gas Chromatographic (GC) data

#### (1) Oxidation of 4-methylcyclohexanone

Column: CP-chirasil-DEX CB 25\*0.25(Agilent), Column temperature: 125°C hold 11.5min, 125°C to 200°C, 10°C per min.

Table S3 Entry S1-4: Temperature=50 °C Time=24h Molar ratio of H<sub>2</sub>O<sub>2</sub>/ Substrate=2:1 CAL-B=10 wt%

4-Methylcyclohexanone: R<sub>t</sub>=2.8 min 4-Methylcaprolactone: R<sub>t</sub>=10.5-11.3 min

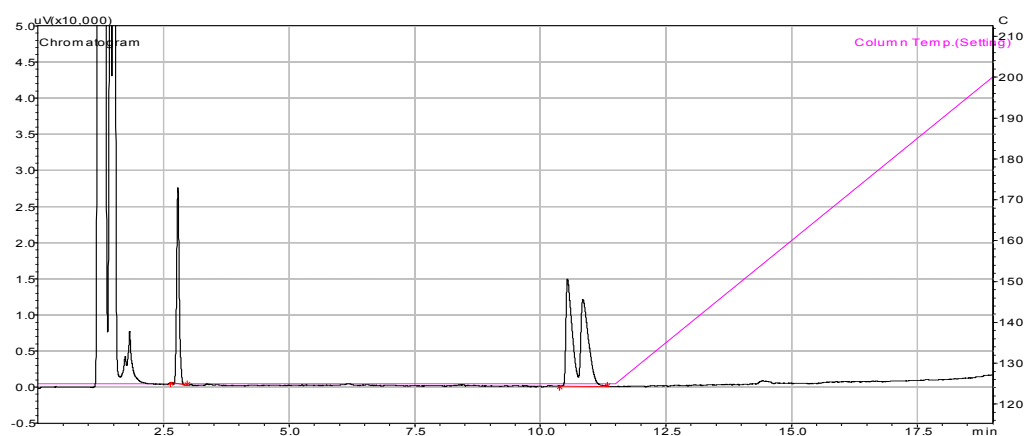

#### (2) Oxidation of 4-ethylcyclohexanone

Column: CP-chirasil-DEX CB 25\*0.25(Agilent), Column temperature: 130°C to 142°C, 1°C per min, 125°C to 200°C, 10°C per min.

Table S3 Entry S2-4: Temperature=50 °C Time=24h Molar ratio of H<sub>2</sub>O<sub>2</sub>/ Substrate=2:1  
CAL-B=10 wt%

4-Ethylcyclohexanone: R<sub>t</sub>=3.2 min 4-Ethylcaprolactone: R<sub>t</sub>=11.0-11.7 min

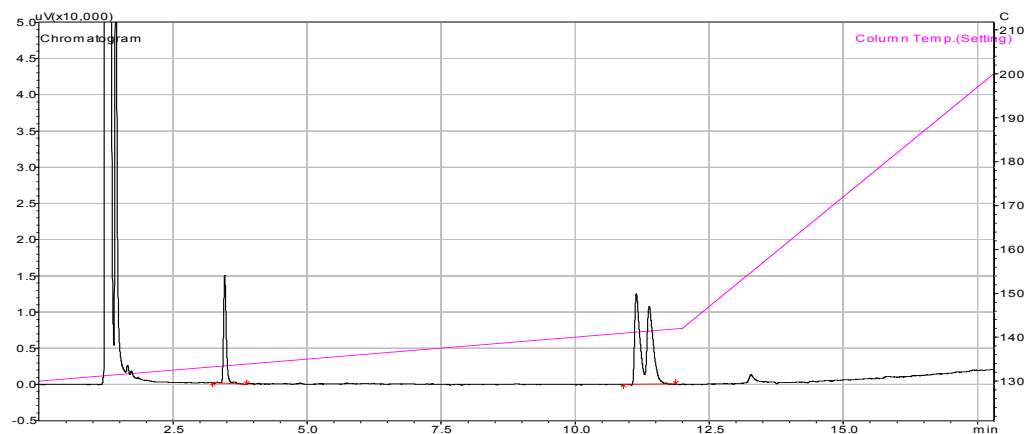

### (3) Oxidation of 2-methylcyclohexanone

Column: CP-chirasil-DEX CB 25\*0.25(Agilent), Column temperature: 125°C hold 11.5min, 125°C to 200°C, 10°C per min.

Table S3 Entry S5-4: Temperature=50 °C Time=24h Molar ratio of H<sub>2</sub>O<sub>2</sub>/ Substrate=2:1  
CAL-B=10 wt%

2-Methylcyclohexanone: R<sub>t</sub>=2.5 min 6-Methylcaprolactone: R<sub>t</sub>=7.2, 8.0 min

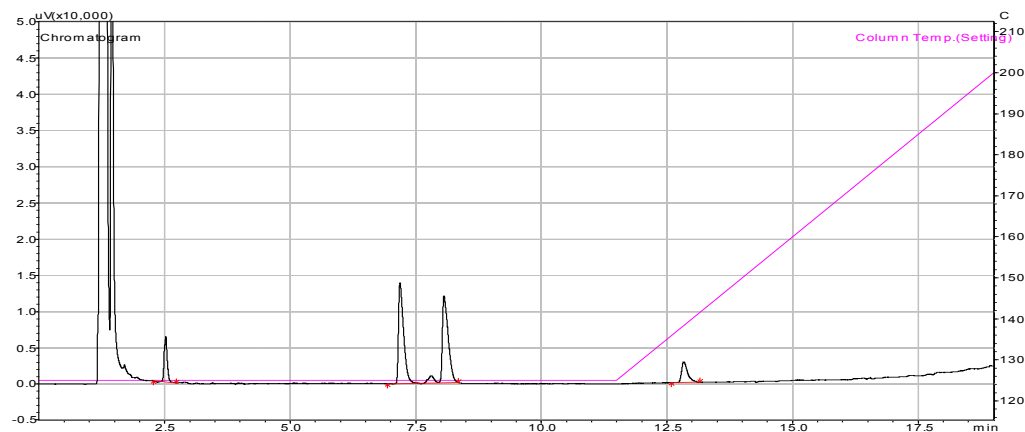

### (4) Oxidation of 3-methylcyclohexanone

Column: CP-chirasil-DEX CB 25\*0.25(Agilent), Column temperature: 100°C hold 7.0min, 100°C to 200°C, 10°C per min.

Table S3 Entry S6-4: Temperature=50 °C Time=24h Molar ratio of H<sub>2</sub>O<sub>2</sub>/ Substrate=2:1  
CAL-B=10 wt%

3-Methylcyclohexanone: R<sub>t</sub>=5.5 min 3-Methylcaprolactone and 5-Methylcaprolactone:  
R<sub>t</sub>=12.5-13.0 min

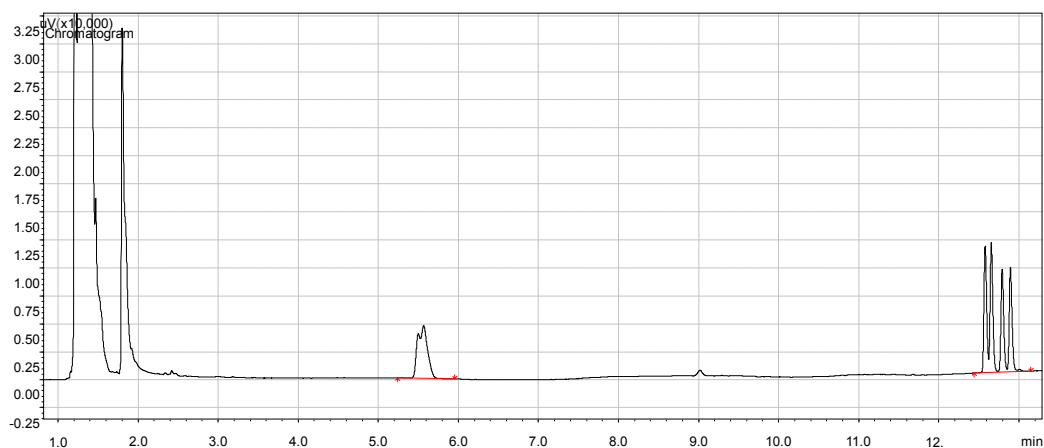

## 5. Representative gel permeation chromatography (GPC) data

### 5.1 GPC chromatograms of reactions listed in Table 2

(1) P(4-methylcaprolactone) catalyzed by CAL-B listed in Table 2

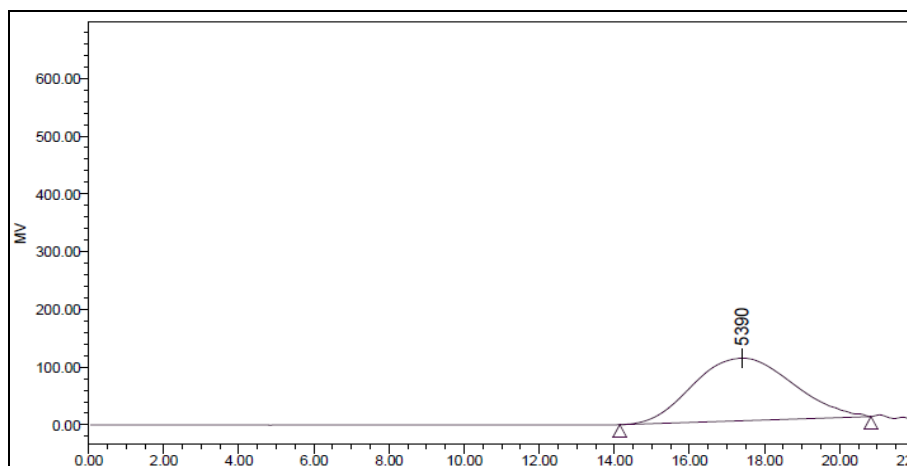

| $M_n$ | $M_w$ | MP   | $M_z$ | $M_{z+1}$ | DPI  | $M_z/M_w$ | $M_{z+1}/M_w$ |
|-------|-------|------|-------|-----------|------|-----------|---------------|
| 4000  | 6102  | 5390 | 8543  | 10975     | 1.53 | 1.40      | 1.80          |

(2) P(4-methylcaprolactone) catalyzed by AK listed in Table 2

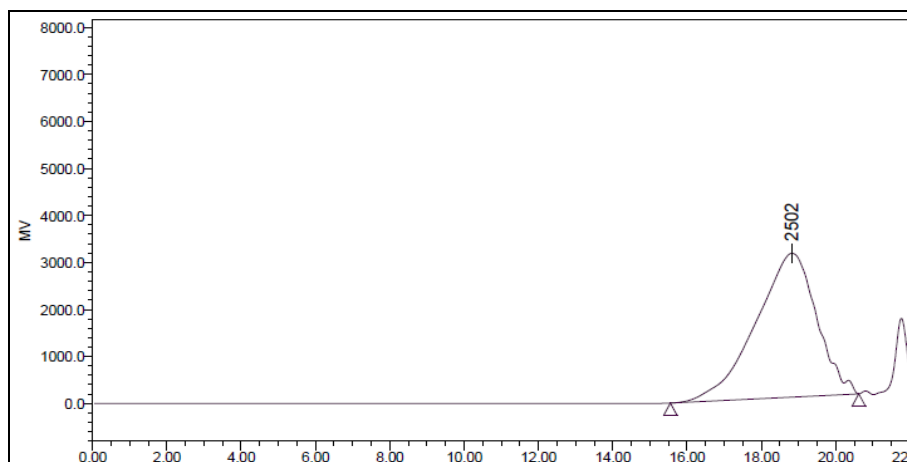



| $M_n$ | $M_w$ | MP   | $M_z$ | $M_{z+1}$ | DPI  | $M_z/M_w$ | $M_{z+1}/M_w$ |
|-------|-------|------|-------|-----------|------|-----------|---------------|
| 2474  | 3165  | 2502 | 4021  | 5012      | 1.28 | 1.27      | 1.58          |

(3) Poly(4-ethylcaprolactone) catalyzed by CAL-B listed in Table 2

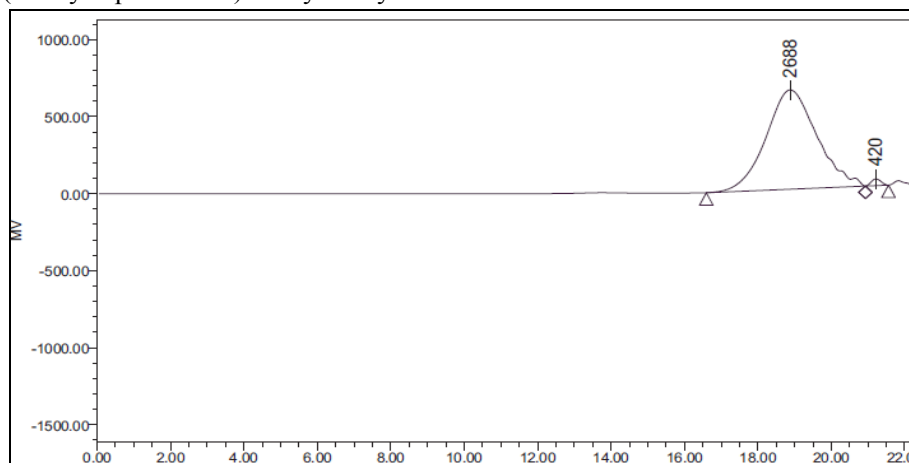

| $M_n$ | $M_w$ | MP   | $M_z$ | $M_{z+1}$ | DPI  | $M_z/M_w$ | $M_{z+1}/M_w$ |
|-------|-------|------|-------|-----------|------|-----------|---------------|
| 2278  | 2745  | 2688 | 3198  | 3641      | 1.20 | 1.16      | 1.33          |

(4) Poly(4-ethylcaprolactone) catalyzed by PPL listed in Table 2

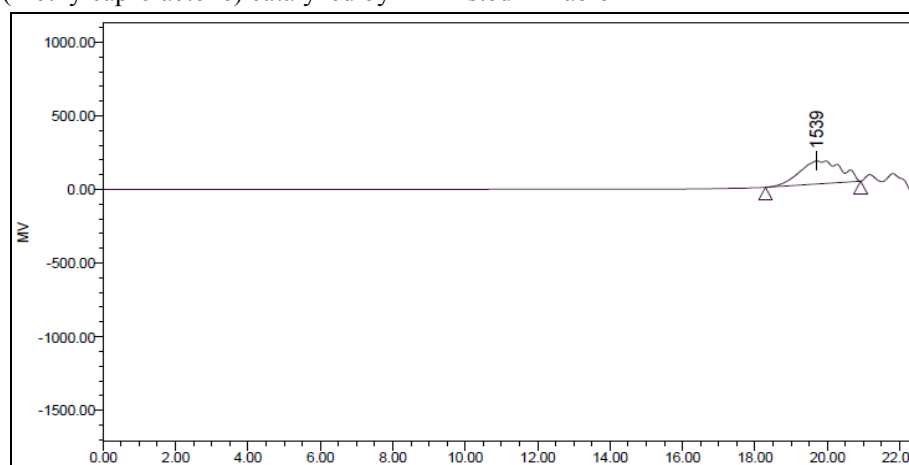

| $M_n$ | $M_w$ | MP   | $M_z$ | $M_{z+1}$ | DPI  | $M_z/M_w$ | $M_{z+1}/M_w$ |
|-------|-------|------|-------|-----------|------|-----------|---------------|
| 1302  | 1490  | 1539 | 1685  | 1875      | 1.14 | 1.13      | 1.26          |

(5) Poly(4-phenylcaprolactone) catalyzed by CAL-B listed in Table 2

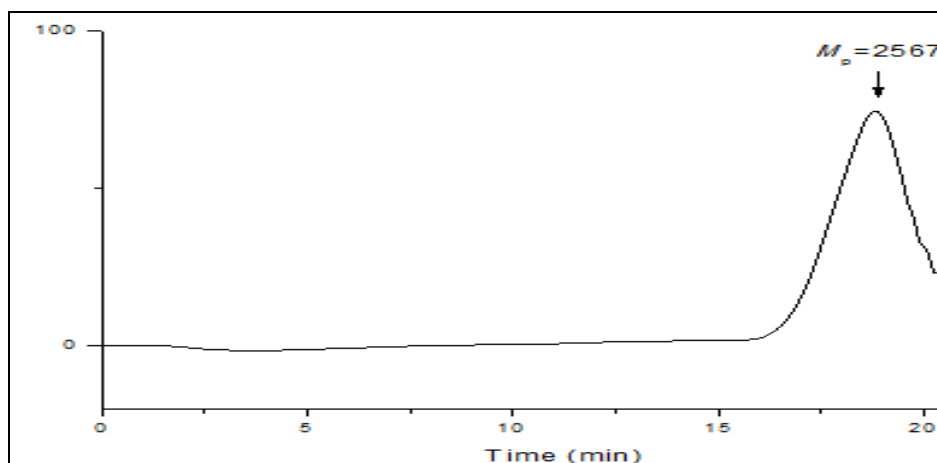

| $M_n$ | $M_w$ | MP   | $M_z$ | $M_{z+1}$ | DPI  | $M_z/M_w$ | $M_{z+1}/M_w$ |
|-------|-------|------|-------|-----------|------|-----------|---------------|
| 2453  | 3100  | 2567 | 3827  | 4574      | 1.26 | 1.23      | 1.47          |

(6) Poly(3-methylcaprolactone)-co-poly(5-Methylcaprolactone) catalyzed by CAL-B listed in Table 2

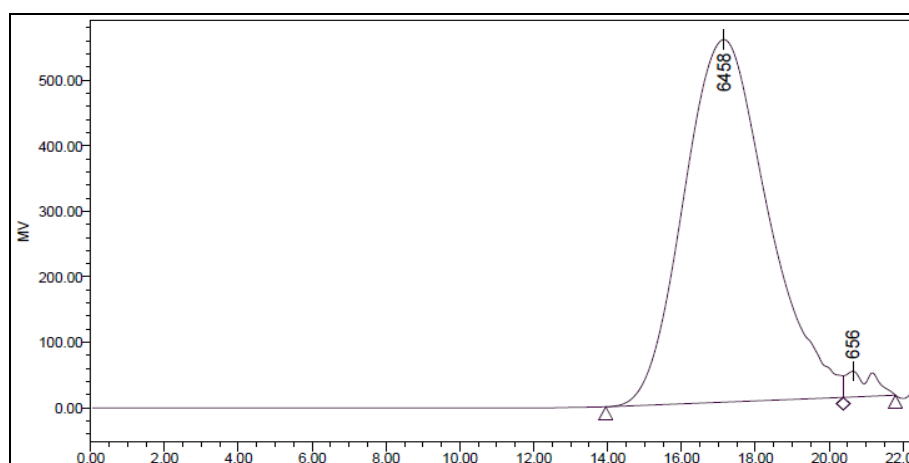

| $M_n$ | $M_w$ | MP   | $M_z$ | $M_{z+1}$ | DPI  | $M_z/M_w$ | $M_{z+1}/M_w$ |
|-------|-------|------|-------|-----------|------|-----------|---------------|
| 4804  | 6888  | 6458 | 9046  | 11255     | 1.43 | 1.31      | 1.63          |

## 5.2 GPC chromatograms of reactions listed in Table 3

(1) P(4-methylcaprolactone) catalyzed by CAL-B listed in Table 3

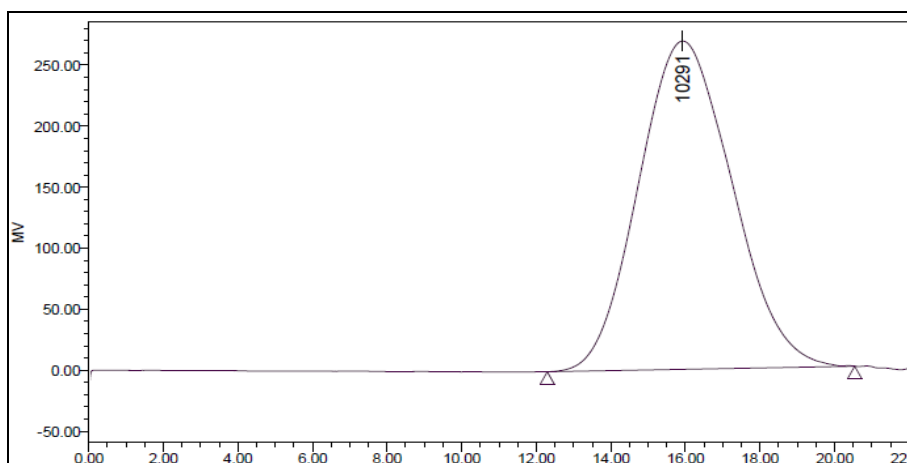

| $M_n$ | $M_w$ | MP    | $M_z$ | $M_{z+1}$ | DPI  | $M_z/M_w$ | $M_{z+1}/M_w$ |
|-------|-------|-------|-------|-----------|------|-----------|---------------|
| 7647  | 11640 | 10291 | 16862 | 23604     | 1.52 | 1.45      | 2.03          |

(2) Poly(4-ethylcaprolactone) catalyzed by CAL-B listed in Table 3

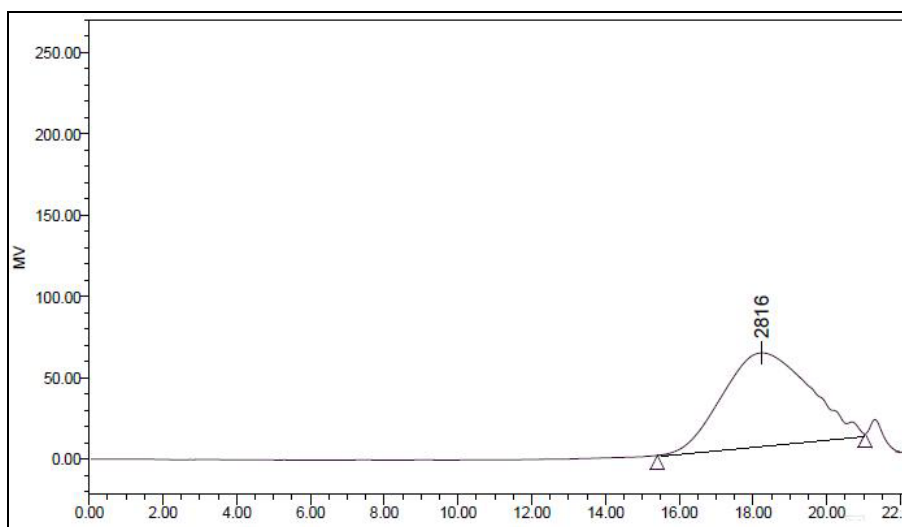

| $M_n$ | $M_w$ | MP   | $M_z$ | $M_{z+1}$ | DPI  | $M_z/M_w$ | $M_{z+1}/M_w$ |
|-------|-------|------|-------|-----------|------|-----------|---------------|
| 2014  | 2740  | 2816 | 4122  | 5314      | 1.36 | 1.51      | 1.94          |

(3) Poly(4-phenylcaprolactone) catalyzed by CAL-B listed in Table 3

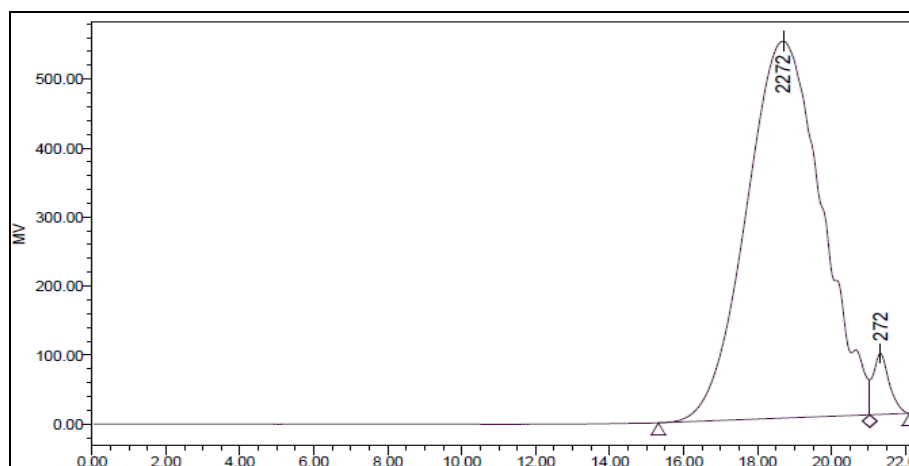

| $M_n$ | $M_w$ | MP   | $M_z$ | $M_{z+1}$ | DPI  | $M_z/M_w$ | $M_{z+1}/M_w$ |
|-------|-------|------|-------|-----------|------|-----------|---------------|
| 1730  | 2521  | 2272 | 3408  | 4340      | 1.46 | 1.35      | 1.72          |

(4) Poly(4-tert-butylcaprolactone) catalyzed by CAL-B listed in Table 3

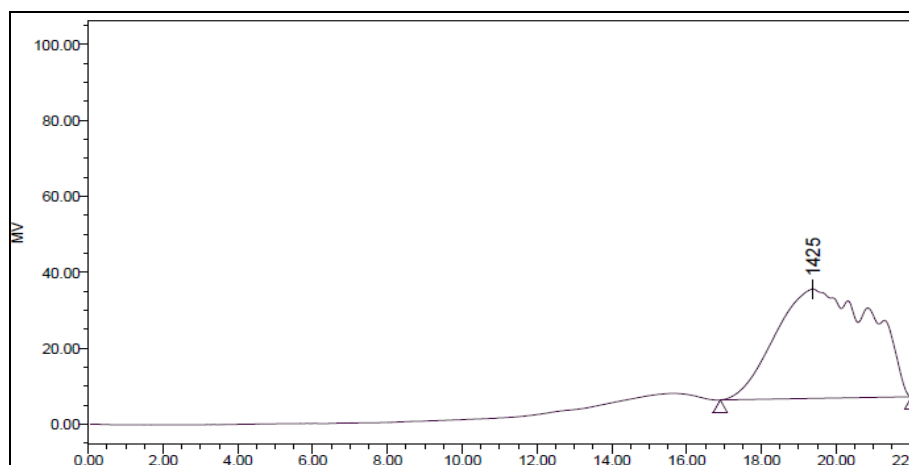

| $M_n$ | $M_w$ | MP   | $M_z$ | $M_{z+1}$ | DPI  | $M_z/M_w$ | $M_{z+1}/M_w$ |
|-------|-------|------|-------|-----------|------|-----------|---------------|
| 721   | 1356  | 1425 | 2104  | 2728      | 1.88 | 1.55      | 2.01          |

(5) Poly(6-methylcaprolactone) catalyzed by CAL-B listed in Table 3

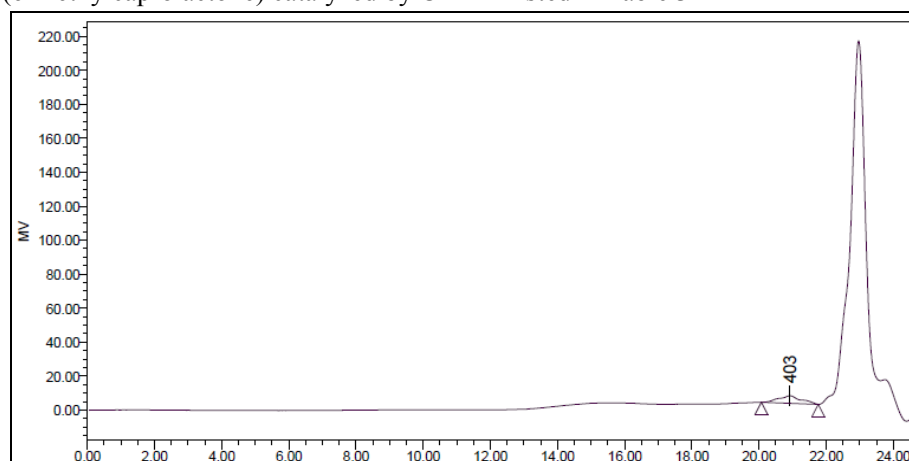

| $M_n$ | $M_w$ | MP  | $M_z$ | $M_{z+1}$ | DPI  | $M_z/M_w$ | $M_{z+1}/M_w$ |
|-------|-------|-----|-------|-----------|------|-----------|---------------|
| 373   | 412   | 403 | 450   | 486       | 1.10 | 1.09      | 1.18          |

(6) Poly(3-methylcaprolactone)-co-poly(5-Methylcaprolactone) catalyzed by CAL-B listed in Table 3

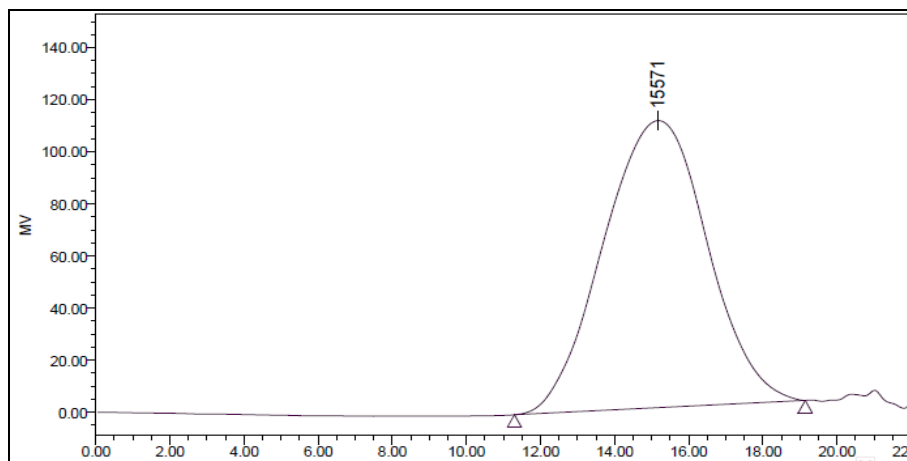

| $M_n$ | $M_w$ | MP    | $M_z$ | $M_{z+1}$ | DPI  | $M_z/M_w$ | $M_{z+1}/M_w$ |
|-------|-------|-------|-------|-----------|------|-----------|---------------|
| 12829 | 21639 | 15571 | 37504 | 61465     | 1.69 | 1.73      | 2.84          |

### 5.3 GPC chromatograms of reactions shown in Fig. 2

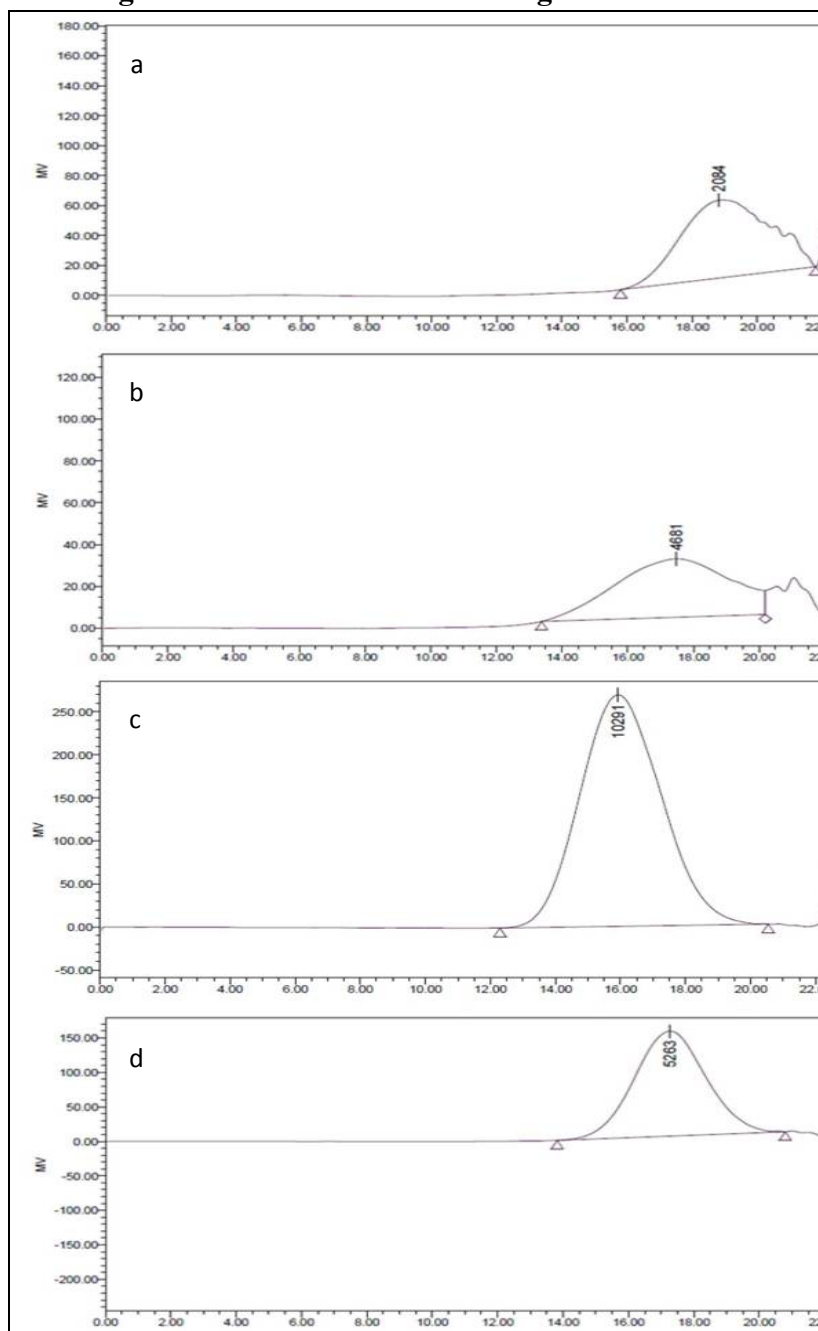

| T/°C | $M_n$ | $M_w$ | MP    | $M_z$ | $M_{z+1}$ | DPI  | $M_z/M_w$ | $M_{z+1}/M_w$ |
|------|-------|-------|-------|-------|-----------|------|-----------|---------------|
| 60   | 1139  | 2217  | 2084  | 3458  | 4569      | 1.95 | 1.56      | 2.06          |
| 70   | 3399  | 6931  | 4681  | 12574 | 18865     | 2.04 | 1.81      | 2.72          |
| 80   | 7647  | 11640 | 10291 | 16862 | 23604     | 1.52 | 1.45      | 2.03          |
| 90   | 4228  | 5963  | 5263  | 7991  | 10347     | 1.41 | 1.34      | 1.74          |

**Figure S4.** The GPC chromatograms of reactions shown in Fig. 2.  
 Temperature (a) 60°C; (b) 70°C; (c) 80°C; (d) 90°C.

### 5.4 GPC chromatograms of reactions shown in Fig. 3

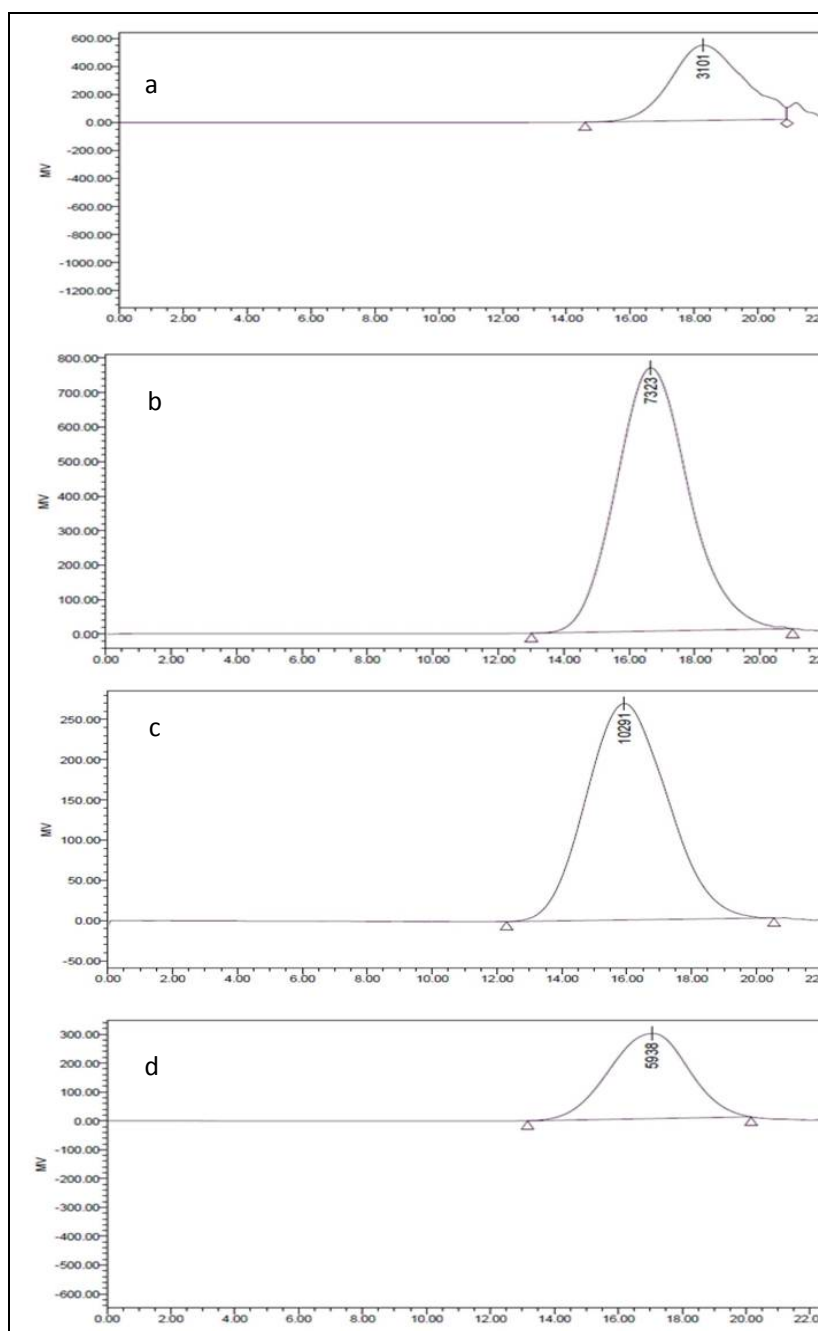

**Figure S5.** The GPC chromatograms of reactions shown in Fig. 3  
 Enzyme amount (a) 0.5 wt%; (b) 5 wt%; (c) 10 wt%; (d) 25 wt%.

| Number | $M_n$ | $M_w$ | MP    | $M_z$ | $M_{z+1}$ | DPI  | $M_z/M_w$ | $M_{z+1}/M_w$ |
|--------|-------|-------|-------|-------|-----------|------|-----------|---------------|
| a      | 2081  | 3258  | 3101  | 4610  | 6081      | 1.57 | 1.41      | 1.87          |
| b      | 5520  | 8000  | 7323  | 10743 | 13923     | 1.45 | 1.34      | 1.74          |
| c      | 7647  | 11640 | 10291 | 16862 | 23604     | 1.52 | 1.45      | 2.03          |
| d      | 5102  | 7514  | 5938  | 10800 | 14967     | 1.47 | 1.44      | 1.99          |

### 5.5 GPC chromatograms of reactions shown in Fig. 4

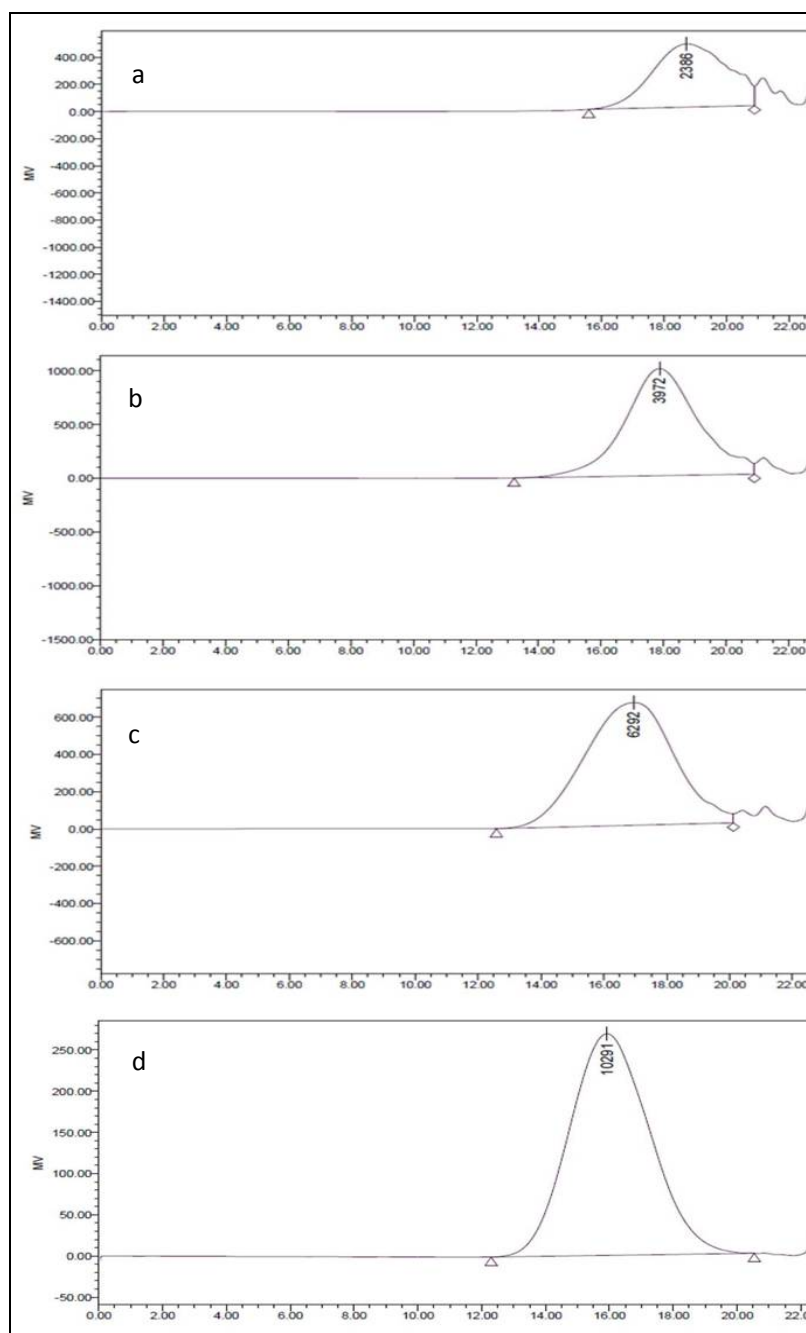

| Number | $M_n$ | $M_w$ | MP    | $M_z$ | $M_{z+1}$ | DPI  | $M_z/M_w$ | $M_{z+1}/M_w$ |
|--------|-------|-------|-------|-------|-----------|------|-----------|---------------|
| a      | 1652  | 2592  | 2386  | 3752  | 4946      | 1.57 | 1.45      | 1.91          |
| b      | 2746  | 4617  | 3972  | 7412  | 11930     | 1.68 | 1.60      | 2.58          |
| c      | 5085  | 8539  | 6292  | 13588 | 20243     | 1.68 | 1.59      | 2.37          |
| d      | 7647  | 11640 | 10291 | 16862 | 23604     | 1.52 | 1.45      | 2.03          |

**Figure S6.** The GPC chromatograms of reactions shown in Fig. 4.  
 Initiator/substrate (a) 1:10; (b) 1:20; (c) 1:30; (d) 1:50.
